# Supplementary material for: The Predictive Value of Radiographs and the Pirani Score for Later Additional Surgery in Ponseti-Treated Idiopathic Clubfeet, an Observational Cohort Study
Source: MDPI journal article supplement (doi:10.3390/children9060865), 2022-06-10
Supplement: s1 [file s1]

**Table S1.** Disease-specific instrument for patients with clubfeet.

| Item                                                                            | Response codes                                                                               |
|---------------------------------------------------------------------------------|----------------------------------------------------------------------------------------------|
| (1) How satisfied are you with the status of your child's foot?                 | 1 = very satisfied, 2 = somewhat satisfied, 3 = somewhat dissatisfied, 4 = very dissatisfied |
| (2) How satisfied are you with the appearance of your child's foot?             | 1 = very satisfied, 2 = somewhat satisfied, 3 = somewhat dissatisfied, 4 = very dissatisfied |
| (3) How often is your child teased because of his or her clubfoot?              | 1 = never, 2 = sometimes, 3 = usually, 4 = always                                            |
| (4) How often does your child have problems finding shoes that fit?             | 1 = never, 2 = sometimes, 3 = usually, 4 = always                                            |
| (5) How often does your child have problems finding shoes that he or she likes? | 1 = never, 2 = sometimes, 3 = usually, 4 = always                                            |
| (6) Does your child ever complain of pain in his or her [affected] foot?        | 1 = never, 2 = sometimes, 3 = usually, 4 = always                                            |
| (7) How limited is your child in his or her ability to walk?                    | 1 = not at all limited, 2 = somewhat limited, 3 = moderately limited, 4 = very limited       |
| (8) How limited is your child in his or her ability to run?                     | 1 = not at all limited, 2 = somewhat limited, 3 = moderately limited, 4 = very limited       |
| (9) How often does your child complain of pain during heavy exercise?           | 1 = never, 2 = sometimes, 3 = usually, 4 = always                                            |
| (10) How often does your child complain of pain during moderate exercise?       | 1 = never, 2 = sometimes, 3 = usually, 4 = always                                            |

**Table S2.** Results according to Richard [9].

|                  |                |                                                                                                                                                                                                                                                                                                                                                                                                         |
|------------------|----------------|---------------------------------------------------------------------------------------------------------------------------------------------------------------------------------------------------------------------------------------------------------------------------------------------------------------------------------------------------------------------------------------------------------|
| excellent result | 45 feet (63 %) |                                                                                                                                                                                                                                                                                                                                                                                                         |
| good result      | 9 feet (13 %)  | 8 single Achilles tendon lengthenings<br>1 three Achilles tendon lengthenings                                                                                                                                                                                                                                                                                                                           |
| fair result      | 18 feet (25 %) | 9 tibialis anterior transfers<br>2 tibialis anterior transfers with Achilles tendon lengthening and guided growth correction of the anterior distal tibia with an 8-plate<br>5 tibialis anterior transfers combined with Achilles tendon lengthening<br>1 Achilles tendon lengthening combined with tibia derotation osteotomy<br>1 posterior capsule release combined with Achilles tendon lengthening |

**Table S3.** Multivariate regression analysis of all univariate predictors ( $p > 0.2$ ) of additional surgery.

|                                    | B     | S.E. | Exp (B) | P    |
|------------------------------------|-------|------|---------|------|
| Lat tibia-calcaneal                | 0.1   | 0.06 | 1.1     | 0.09 |
| Lat talo-calcaneal                 | 0.06  | 0.06 | 1.0     | 0.4  |
| Lat foot dorsiflexion              | -0.05 | 0.05 | 0.95    | 0.3  |
| Pirani score before the first cast | 0.1   | 0.37 | 1.2     | 0.7  |
| Pirani score before tenotomy       | 1.1   | 0.60 | 3.1     | 0.06 |
| Pirani score before radiograph     | 0.1   | 0.95 | 1.1     | 0.9  |

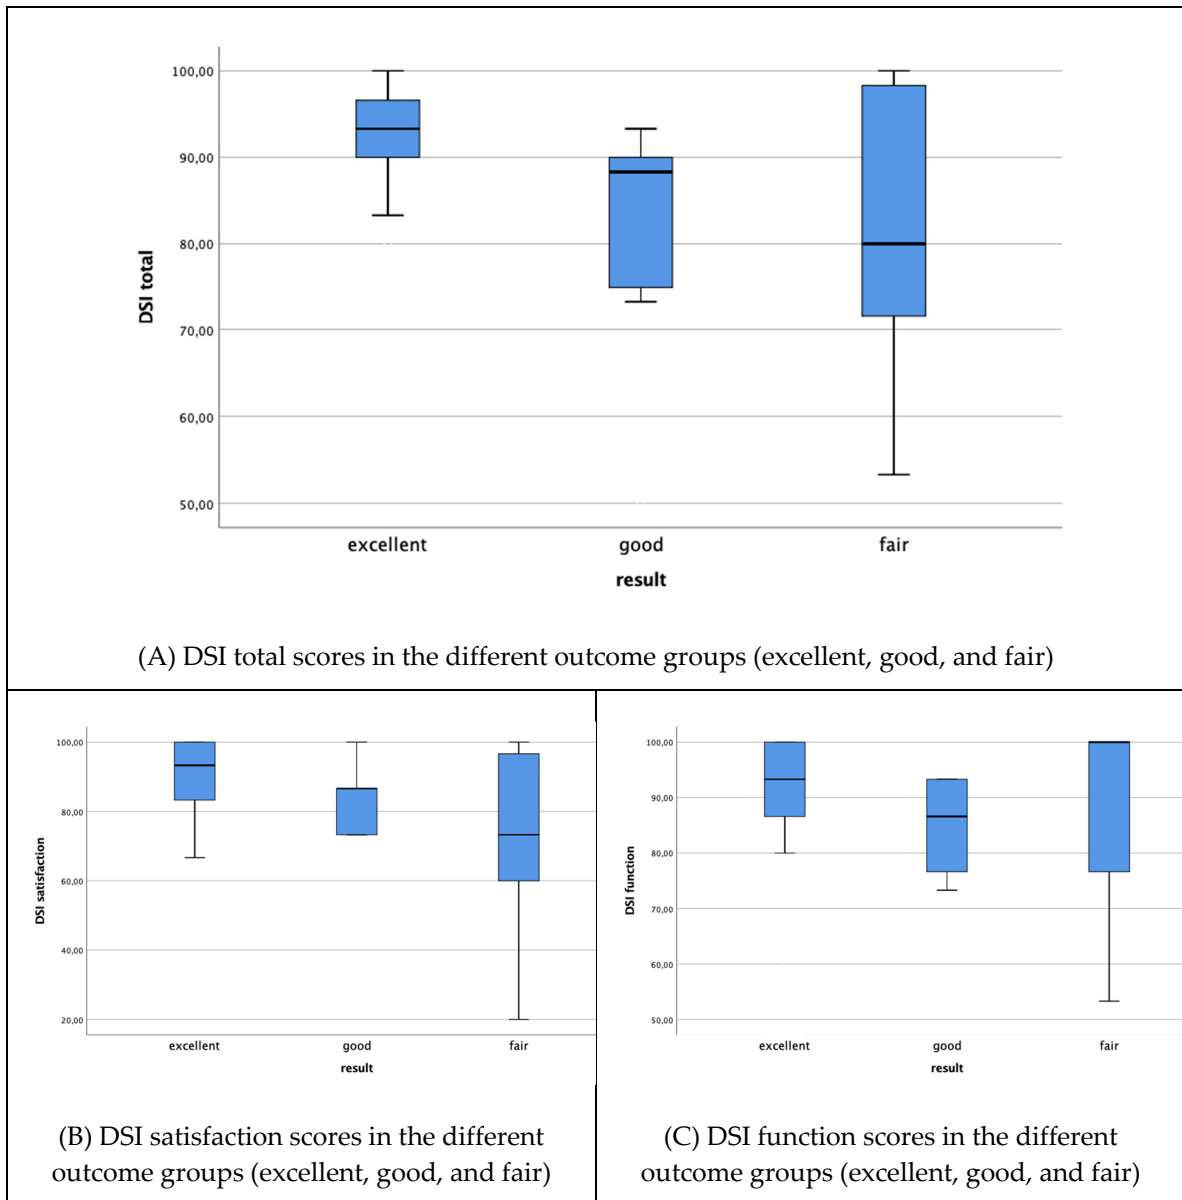

**Figure S1.** Boxplot DSI scores in outcome groups.
